# Supplementary material for: Disentangling the resonant Auger spectra of ozone: overlapping core-hole states and core-excited state dynamics
Source: Royal Society of Chemistry journal article supplement (doi:10.1039/d2cp03709b), 2022-01-01
Supplement: d2cp03709b1.pdf [file d2cp03709b1.pdf]

# Disentangling the Resonant Auger Spectra of Ozone: Overlapping Core-Hole States and Core-Excited State Dynamics. Supplementary Information

Bruno Nunes Cabral Tenorio,<sup>\*,†</sup> Klaus B. Møller,<sup>†</sup> Piero Decleva,<sup>‡</sup> and Sonia  
Coriani<sup>\*,†</sup>

<sup>†</sup>*DTU Chemistry - Department of Chemistry, Technical University of Denmark,  
Kemitorvet Bldg 207, DK-2800 Kongens Lyngby, Denmark*

<sup>‡</sup>*Istituto Officina dei Materiali IOM-CNR and Dipartimento di Scienze Chimiche e  
Farmaceutiche, Università degli Studi di Trieste, I-34121 Trieste, Italy*

E-mail: brncat@dtu.dk; soco@kemi.dtu.dk

For the computation of Auger decay rates according to Equation 11 (main text), one can utilize tabulated atomic two-electron integrals available in the literature,<sup>1-3</sup> or calculate them numerically. We use the values from Ref. 1. They are of the type

$$\langle \chi_{Elm} \chi_{\kappa l_{\kappa} m_{\kappa}} | \chi_{l_l m_l} \chi_{\rho l_{\rho} m_{\rho}} \rangle$$

which reduce to a sum of radial integrals ( $R^k$ ) and analytical angular coefficients ( $C^k$ )

$$\langle \chi_{\alpha} \chi_{\beta} | \chi_{\eta} \chi_{\delta} \rangle = \delta(m_{\alpha} + m_{\beta}, m_{\eta} + m_{\delta}) \sum_k R^k(\alpha\beta; \eta\delta) C^k(l_{\alpha} m_{\alpha}; l_{\eta} m_{\eta}) C^k(l_{\delta} m_{\delta}; l_{\beta} m_{\beta})$$

$$R^k(\alpha\beta; \eta\delta) = \int R_{n_\alpha l_\alpha}(1) R_{n_\beta l_\beta}(2) \frac{r^k}{r^{k+1}} R_{n_\eta l_\eta}(1) R_{n_\delta l_\delta}(2) r_1^2 dr_1 r_2^2 dr_2$$

$$C^k(l_\alpha m_\alpha; l_\beta m_\beta) = \sqrt{\frac{4\pi}{2k+1}} \int Y_{l_\alpha m_\alpha}^* Y_{l_\beta m_\beta} Y_{k m_\alpha - m_\beta} \sin \theta d\theta d\phi =$$

$$(-1)^{m_\alpha} \sqrt{(2l_\alpha + 1)(2l_\beta + 1)} \begin{pmatrix} l_\alpha & l_\beta & k \\ 0 & 0 & 0 \end{pmatrix} \begin{pmatrix} l_\alpha & l_\beta & k \\ -m_\alpha & m_\beta & m_\alpha - m_\beta \end{pmatrix}$$

with

$$|l_\alpha - l_\beta| \leq k \leq l_\alpha + l_\beta \quad l_\alpha + l_\beta + k \text{ even.}$$

They can be easily evaluated on the fly, but also calculated once, then tabulated and stored.

Here, we use  $R^k$  from Ref. 1, whereas  $C^k$  are generated analytically on the fly.

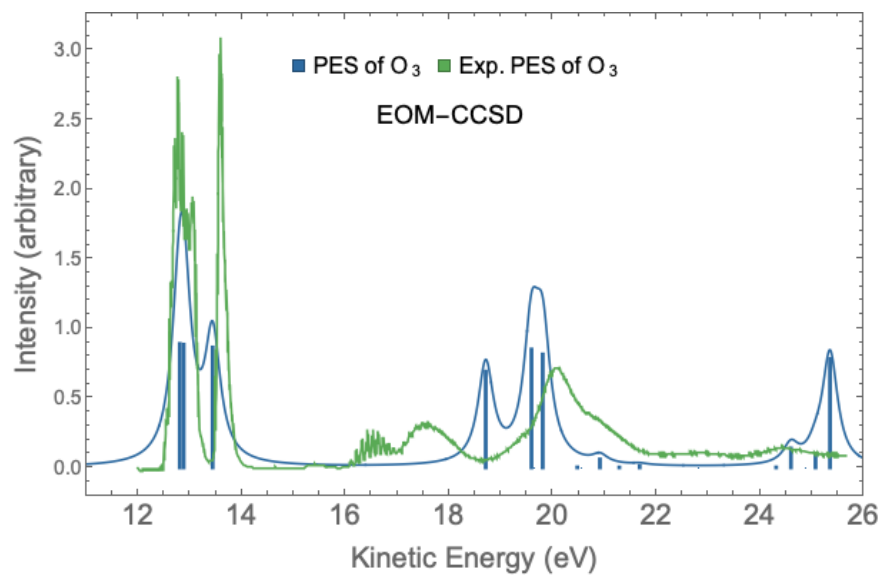

Figure S1: Ozone. PES computed at the EOM-CCSD/cc-pVTZ level of theory at the ground state geometry. The spectrum was broadened with Lorentzian functions with  $\text{hwhm} = 0.10$  eV.

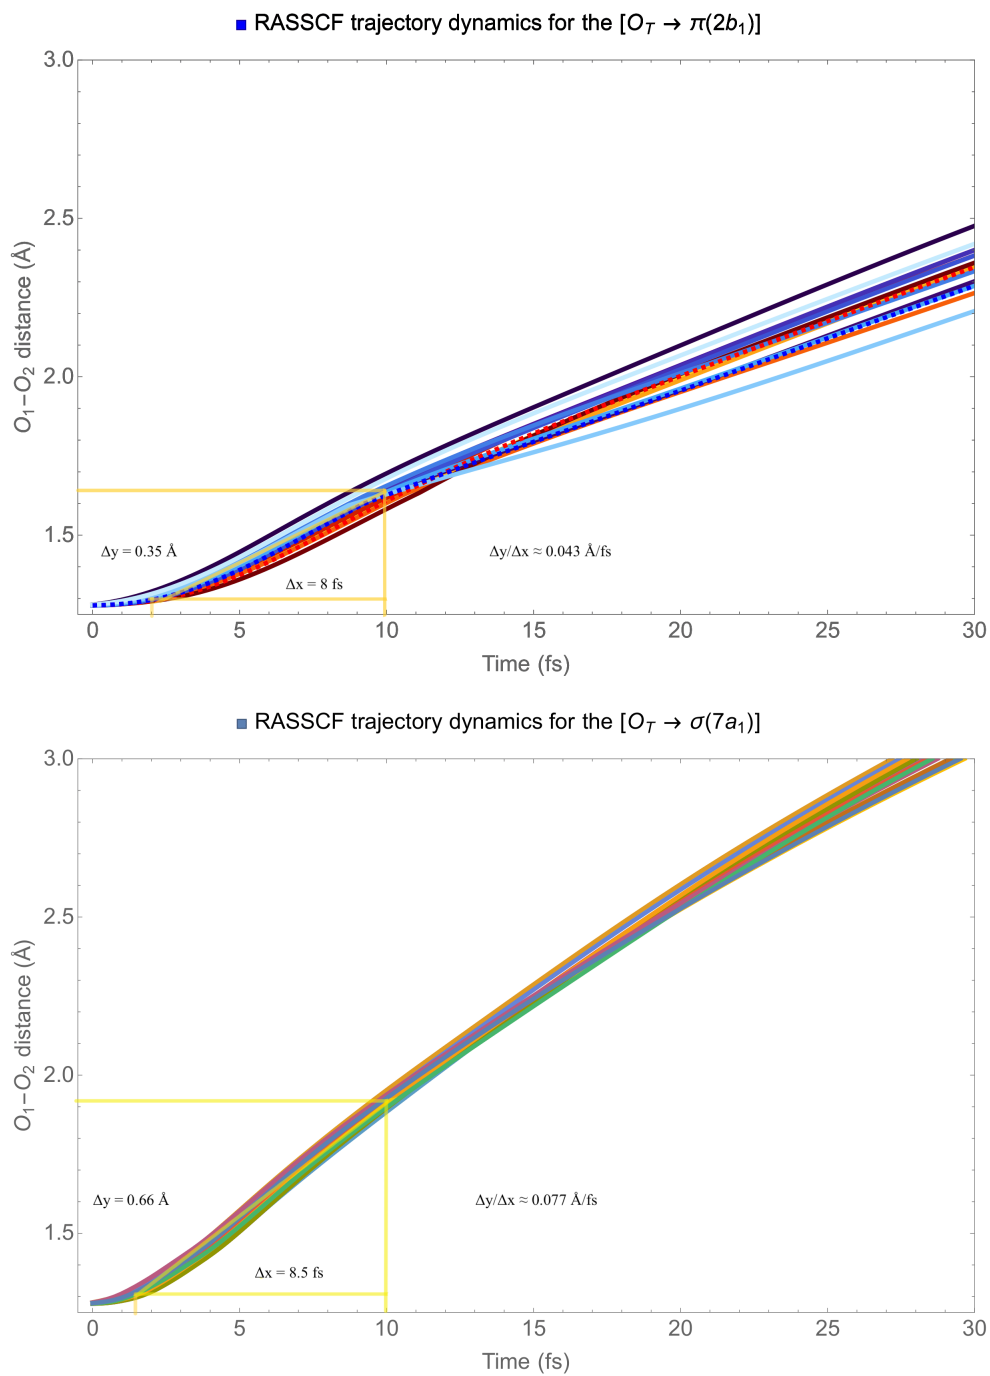

Figure S2: Ozone. Trajectory molecular dynamics at the core-excited states  $1s_{O_T} \rightarrow \pi(2b_1)$  (top) and  $1s_{O_T} \rightarrow \sigma^*(7a_1)$  (bottom) using sixteen initial conditions from a Maxwell–Boltzmann distribution at 300 K.

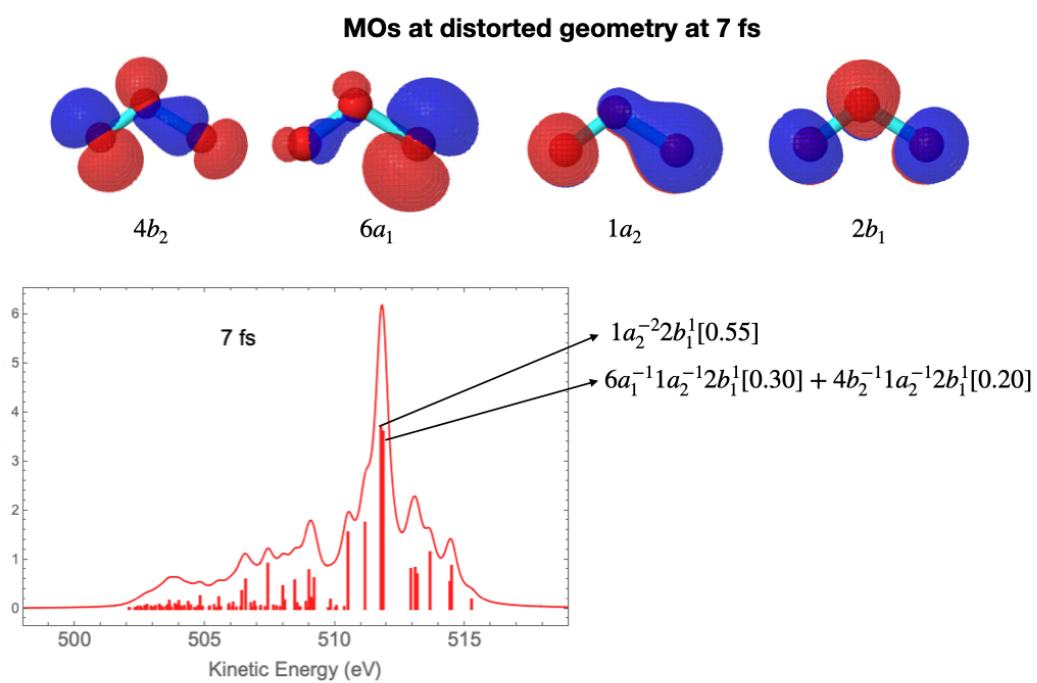

Figure S3: RAES of  $O_3$  at the  $1s_{O_T} \rightarrow \pi^*(2b_1)$  resonance computed with the geometry at 7 fs.

## References

- (1) McGuire, E. J. *K*-Shell Auger Transition Rates and Fluorescence Yields for Elements Be-Ar. *Phys. Rev.* **1969**, *185*, 1–6.
- (2) Walters, D. L.; Bhalla, C. P. Nonrelativistic K-shell Auger rates and matrix elements for  $4 \leq Z \leq 54$ . *Atomic Data* **1971**, *3*, 301–315.
- (3) Chen, M. H.; Larkins, F. P.; Crasemann, B. Auger and Coster-Kronig radial matrix elements for atomic numbers  $6 \leq Z \leq 92$ . *Atomic Data and Nuclear Data Tables* **1990**, *45*, 1–205.
